# Supplementary material
Source: Springer Nature journal article supplement (https://www.springermedizin.de/resource/supplementary/13063_2011_751_MOESM1_ESM.pdf/9618658)
Supplement: MOESM1 [file 9618658]

## **Figure 1: Whooley questions**

Question 1: 'Over the past month, have you been bothered by feeling down, depressed or hopeless?'

Question 2: 'Over the past month, have you been bothered by having little interest or pleasure in doing things?'
